# Supplementary material
Source: publisher figshare collection journal article supplement (https://acs.figshare.com/ndownloader/files/4309615)

Supporting Information

**Synthesis and Evaluation of Anti-hepatocellular Carcinoma Activity of  
Novel Nitric Oxide-releasing Derivatives of Farnesylthiosalicylic Acid**

*Yong Ling, Xiaolei Ye, Yihua Zhang,\* Zhenzhen Zhang, Yisheng Lai, Hui Ji,\* Sixun Peng, and Jide Tian*

**Table of contents:**

Table of compound purity by HPLC

S2

## HPLC assessment of compound purity.

Target compounds (**8a-p**) with a purity of >95% (HPLC analysis) were used for subsequent experiments. We provided the spectra of HPLC assays as below.

Column: Inertex C18 (150mm×4.6mm×5μm);

Mobile phase: Methanol: ammonium acetate buffer (32 mmol/L, pH 5.0) = 90: 10;

Wavelength: 254 nm;

Rate: 1 mL/min;

Temperature: 30 °C;

Pressure: 89-122 kgf.

**8a**, 97.7%

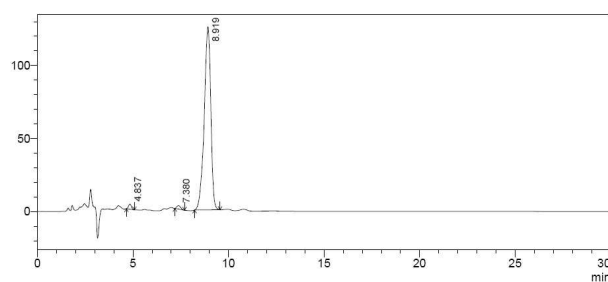

**8b**, 98.6%

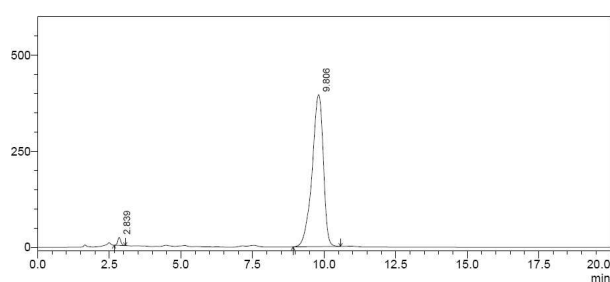

**8c**, 100%

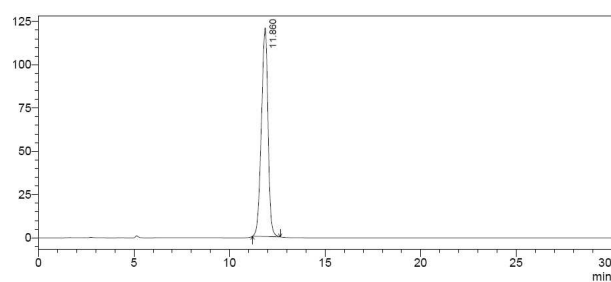

**8d**, 98.4%

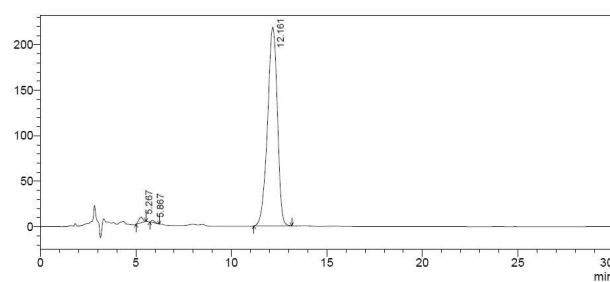

**8e**, 99.6%

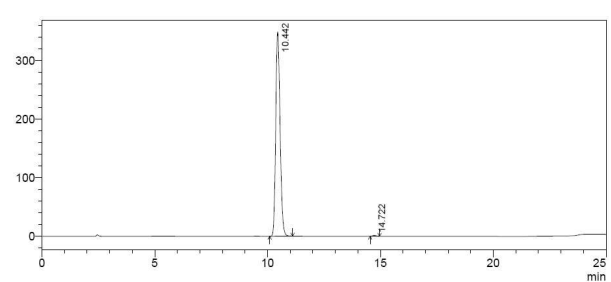

**8f**, 97.4%

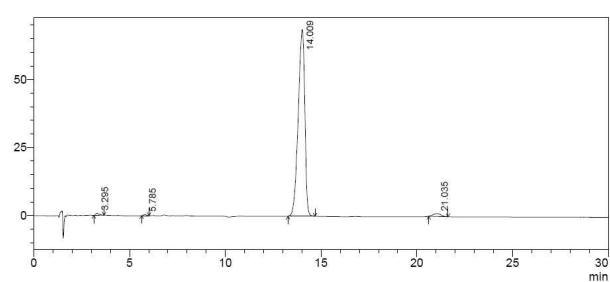

**8g, 98.3%**

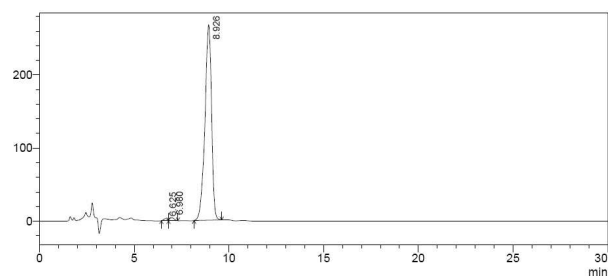

**8h, 97.9%**

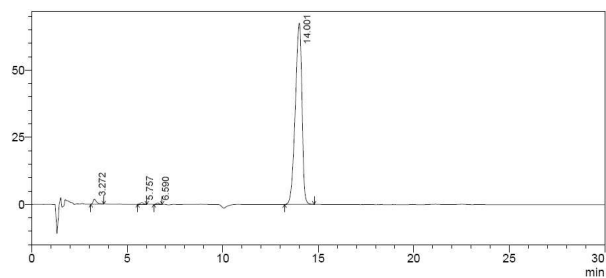

**8i, 96.6%**

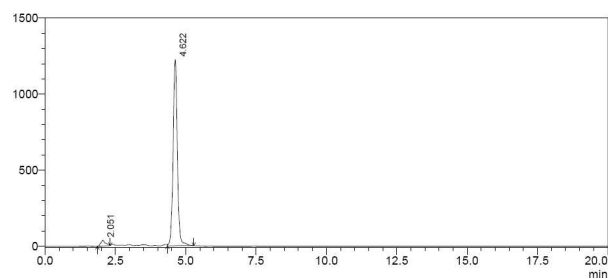

**8j, 99.1%**

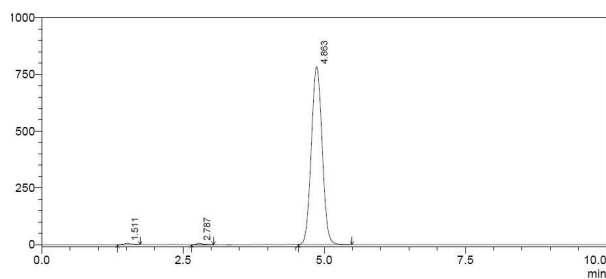

**8k, 99.8%**

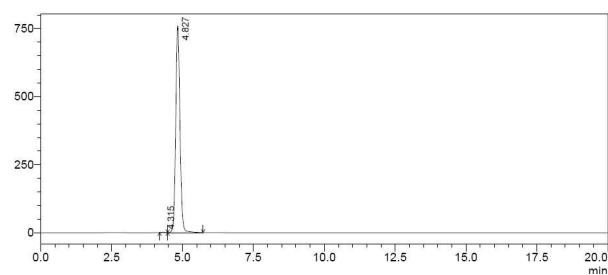

**8l, 100%**

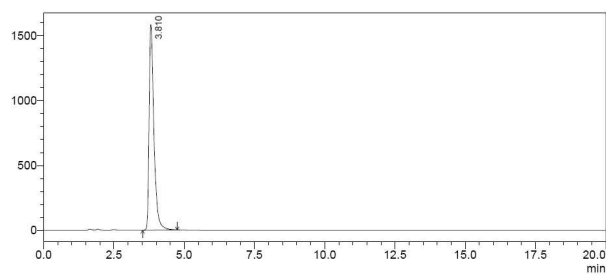

**8m, 99.1%**

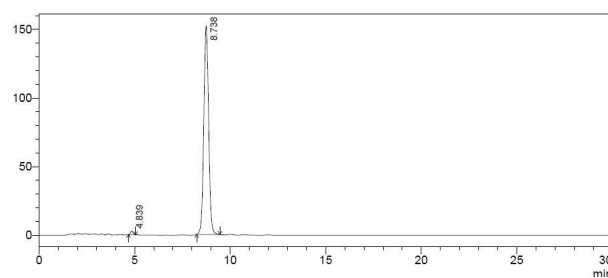

**8n, 100%**

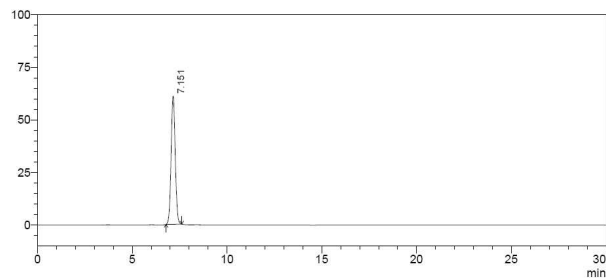

**8o, 100%**

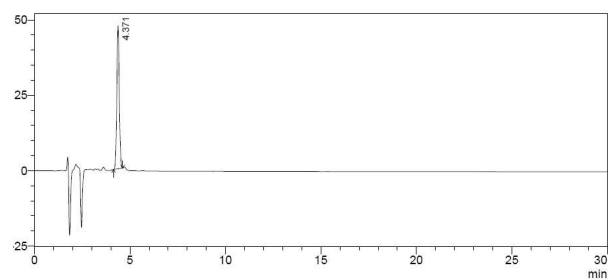

**8p, 100%**

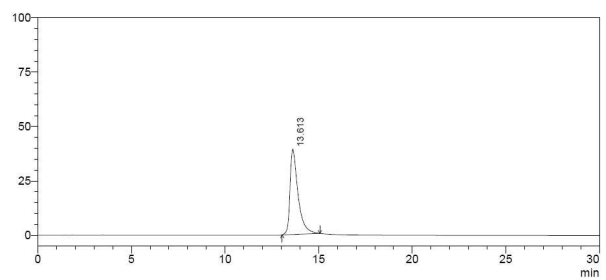

Supplement: Supplementary file 1 [file 4309615]
